# Supplementary material
Source: HighWire-hosted journal article supplement (https://erj.ersjournals.com/content/61/6/2300128)
Supplement: inline-supplementary-material-2 [file inline-supplementary-material-2.pdf]

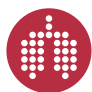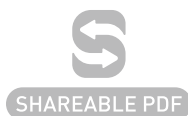

# Developing a pan-European technical standard for a comprehensive high-quality lung cancer computed tomography screening programme: an ERS technical standard

David R. Baldwin<sup>1,2</sup>, Emma L. O'Dowd<sup>2</sup>, Ilona Tietzova<sup>3</sup>, Anna Kerpel-Fronius<sup>4</sup>, Marjolein A. Heuvelmans<sup>5,6</sup>, Annemiek Snoeckx<sup>7</sup>, Haseem Ashraf<sup>8,9</sup>, Hans-Ulrich Kauczor<sup>10</sup>, Blin Nagavci<sup>11</sup>, Matthijs Oudkerk<sup>6</sup>, Paul Martin Putera<sup>12,13</sup>, Witold Ryzman<sup>14</sup>, Giulia Veronesi<sup>15</sup>, Andrea Borondy-Kitts<sup>16</sup>, Antoni Rosell Gratacos<sup>17</sup>, Jan van Meerbeeck<sup>18</sup> and Torsten G. Blum<sup>19</sup>

<sup>1</sup>Department of Respiratory Medicine, Nottingham University Hospitals NHS Trust, Nottingham, UK. <sup>2</sup>Epidemiology and Public Health, University of Nottingham, Nottingham, UK. <sup>3</sup>1st Department of Tuberculosis and Respiratory Diseases, Charles University, Prague, Czech Republic. <sup>4</sup>Department of Radiology, National Koranyi Institute of Pulmonology, Budapest, Hungary. <sup>5</sup>Department of Epidemiology, University of Groningen, University Medical Center Groningen, Groningen, The Netherlands. <sup>6</sup>Institute for Diagnostic Accuracy (iDNA), University of Groningen, University Medical Center Groningen, Groningen, The Netherlands. <sup>7</sup>Department of Radiology, UZ Antwerpen, Edegem, Belgium. <sup>8</sup>Department of Radiology, Akershus University Hospital, Oslo, Norway. <sup>9</sup>Institute for Clinical Medicine, University of Oslo Faculty of Medicine, Oslo, Norway. <sup>10</sup>Department of Radiology, University Hospital Heidelberg, Heidelberg, Germany. <sup>11</sup>Institute for Evidence in Medicine, University of Freiburg, Freiburg im Breisgau, Germany. <sup>12</sup>Department of Radiation Oncology, Kantonsspital Sankt Gallen, Sankt Gallen, Switzerland. <sup>13</sup>Department of Radiation Oncology, Inselspital Universitätsspital Bern, Bern, Switzerland. <sup>14</sup>Department of Thoracic Oncology, Medical University of Gdansk, Gdansk, Poland. <sup>15</sup>Department of Thoracic Surgery, Clinical Institute Humanitas, Rozzano, Italy. <sup>16</sup>Rescue Lung Society and Prosumer Health, Hartford, CT, USA. <sup>17</sup>Hospital Universitari Germans Trias, Barcelona, Spain. <sup>18</sup>Department of Pulmonology and Thoracic Oncology, UZ Antwerpen, Edegem, Belgium. <sup>19</sup>Lungenklinik Heckeshorn, HELIOS Klinikum Emil von Behring GmbH, Berlin, Germany.

Corresponding author: David R. Baldwin ([david.baldwin@nottingham.ac.uk](mailto:david.baldwin@nottingham.ac.uk))

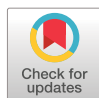

Shareable abstract (@ERSpublications)

**Lung cancer screening with LDCT has been recommended for stepwise implementation in Europe. A high-quality programme is essential for clinical and cost-effectiveness. This ERS technical standard defines the standards needed to achieve this.** <https://bit.ly/3KT2qOz>

**Cite this article as:** Baldwin DR, O'Dowd EL, Tietzova I, *et al.* Developing a pan-European technical standard for a comprehensive high-quality lung cancer computed tomography screening programme: an ERS technical standard. *Eur Respir J* 2023; 61: 2300128 [DOI: 10.1183/13993003.00128-2023].

This single-page version can be shared freely online.

Copyright ©The authors 2023.  
For reproduction rights and  
permissions contact  
[permissions@ersnet.org](mailto:permissions@ersnet.org)

Received: 23 Jan 2023  
Accepted: 16 March 2023

## Abstract

**Background** Screening for lung cancer with low radiation dose computed tomography (LDCT) has a strong evidence base. The European Council adopted a recommendation in November 2022 that lung cancer screening (LCS) be implemented using a stepwise approach. The imperative now is to ensure that implementation follows an evidence-based process that delivers clinical and cost-effectiveness. This European Respiratory Society (ERS) Task Force was formed to provide a technical standard for a high-quality LCS programme.

**Method** A collaborative group was convened to include members of multiple European societies. Topics were identified during a scoping review and a systematic review of the literature was conducted. Full text was provided to members of the group for each topic. The final document was approved by all members and the ERS Scientific Advisory Committee.

**Results** Topics were identified representing key components of a screening programme. The actions on findings from the LDCT were not included as they are addressed by separate international guidelines (nodule management and clinical management of lung cancer) and by a linked ERS Task Force (incidental findings). Other than smoking cessation, other interventions that are not part of the core screening process were not included (*e.g.* pulmonary function measurement). 56 statements were produced and areas for further research identified.

**Conclusions** This European collaborative group has produced a technical standard that is a timely contribution to implementation of LCS. It will serve as a standard that can be used, as recommended by the European Council, to ensure a high-quality and effective programme.
